# Supplementary material for: Pharmacological screening and transcriptomic functional analyses identify a synergistic interaction between dasatinib and olaparib in triple‐negative breast cancer
Source: PubMed Central journal article supplement (PMC7077558; doi:10.1111/jcmm.14980), 2020-02-07
Supplement: JCMM-24-3117-s002.pdf [file JCMM-24-3117-s002.pdf]

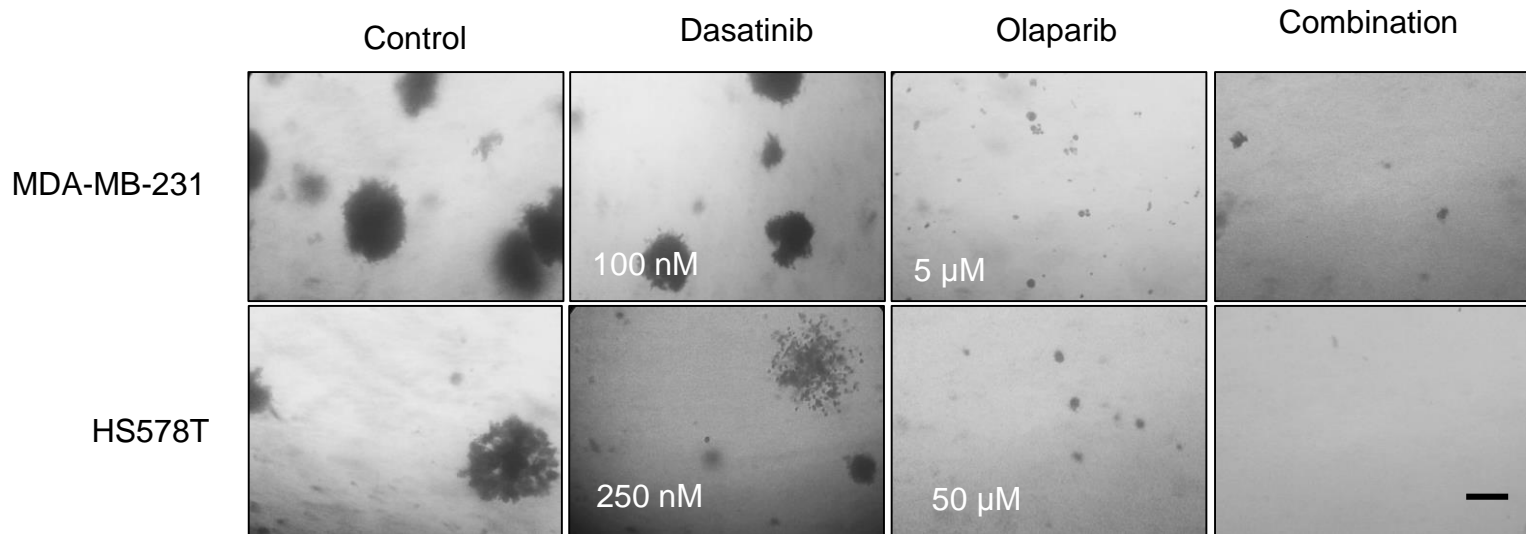

Supplementary Figure 2
