# Supplementary material for: Pharmacological screening and transcriptomic functional analyses identify a synergistic interaction between dasatinib and olaparib in triple‐negative breast cancer
Source: PubMed Central journal article supplement (PMC7077558; doi:10.1111/jcmm.14980), 2020-02-07
Supplement: JCMM-24-3117-s005.pdf [file JCMM-24-3117-s005.pdf]

| Cell line  | Type of cancer                | BRCA1 status       | BRCA2 status              |
|------------|-------------------------------|--------------------|---------------------------|
| MDA-MB-231 | Triple negative breast cancer | Wild type          | Wild type                 |
| HS-578T    |                               | Wild type          | Wild type                 |
| HCC3153    |                               | In Frame insertion | Wild type                 |
| BT549      |                               | Wild type          | Wild type                 |
| SKOV3      | Ovarian cancer                | Wild type          | Wild type                 |
| IGROV1     |                               | Wild type          | Silent/ Missense mutation |
| OVCAR3     |                               | Wild type          | Wild type                 |
| OVCAR8     |                               | Wild type          | Wild type                 |
| A549       | Lung cancer                   | Wild type          | Wild type                 |
| H727       |                               | Missense mutation  | Wild type                 |
| H1299      |                               | Wild type          | Wild type                 |
| SCC40      | Head and neck carcinoma       | Wild type          | Wild type                 |
| SCC38      |                               | Wild type          | Wild type                 |
| SCC2       |                               | Wild type          | Wild type                 |
| PC3        | Prostate cancer               | Wild type          | Wild type                 |
| DU145      |                               | Missense mutation  | Missense mutation         |
| HT29       | Colorectal cancer             | Wild type          | Wild type                 |
| SW620      |                               | Wild type          | Wild type                 |
| SW480      |                               | Wild type          | Wild type                 |
| MCF7       | No TNBC breast cancer         | Wild type          | Wild type                 |
| BT474      |                               | Wild type          | Nonsense mutation         |

Supplimentary table 2
