# Supplementary material for: Pharmacological screening and transcriptomic functional analyses identify a synergistic interaction between dasatinib and olaparib in triple‐negative breast cancer
Source: PubMed Central journal article supplement (PMC7077558; doi:10.1111/jcmm.14980), 2020-02-07
Supplement: JCMM-24-3117-s006.pdf [file JCMM-24-3117-s006.pdf]

**Combination: Olaparib ( $\mu\text{M}$ ) + Dasatinib (nM)**

| <b>Cell line</b>                                   | <b>COMB.1</b> | <b>COMB.2</b> | <b>COMB.3</b> | <b>COMB.4</b> | <b>COMB.5</b> |
|----------------------------------------------------|---------------|---------------|---------------|---------------|---------------|
| <i>A549, SKOV3, OVCAR3, OVCAR8, IGROV1 y SCC40</i> | 2+10          | 4+20          | 6+30          | 8+40          | 10+50         |
| <i>MDA-MB-231 y DU145</i>                          | 2+20          | 4+40          | 6+60          | 8+80          | 10+100        |
| <i>MCF7</i>                                        | 2+40          | 4+80          | 6+120         | 8+160         | 10+200        |
| <i>H1299 y SCC38</i>                               | 4+20          | 8+40          | 12+60         | 16+80         | 20+100        |
| <i>HT29</i>                                        | 10+10         | 20+20         | 30+30         | 40+40         | 50+50         |
| <i>SCC2</i>                                        | 10+20         | 20+40         | 30+60         | 40+80         | 50+100        |
| <i>PC3</i>                                         | 10+40         | 20+80         | 30+120        | 40+160        | 50+200        |
| <i>BT474</i>                                       | 20+10         | 40+20         | 60+30         | 80+40         | 100+50        |
| <i>HS-578T, BT549 y H727</i>                       | 20+20         | 40+40         | 60+60         | 80+80         | 100+100       |
| <i>HCC3135, SW480 y SW620</i>                      | 20+40         | 40+80         | 60+120        | 80+160        | 100+200       |

Supplementary table 3
